# Supplementary material for: Giants, Dwarfs and the Environment – Metamorphic Trait Plasticity in the Common Frog
Source: PLOS journal article supplement (doi:10.1371/journal.pone.0089982), 2014-03-05
Supplement: S8 (10.1371/journal.pone.0089982.s008) [file journal.pone.0089982.s008]

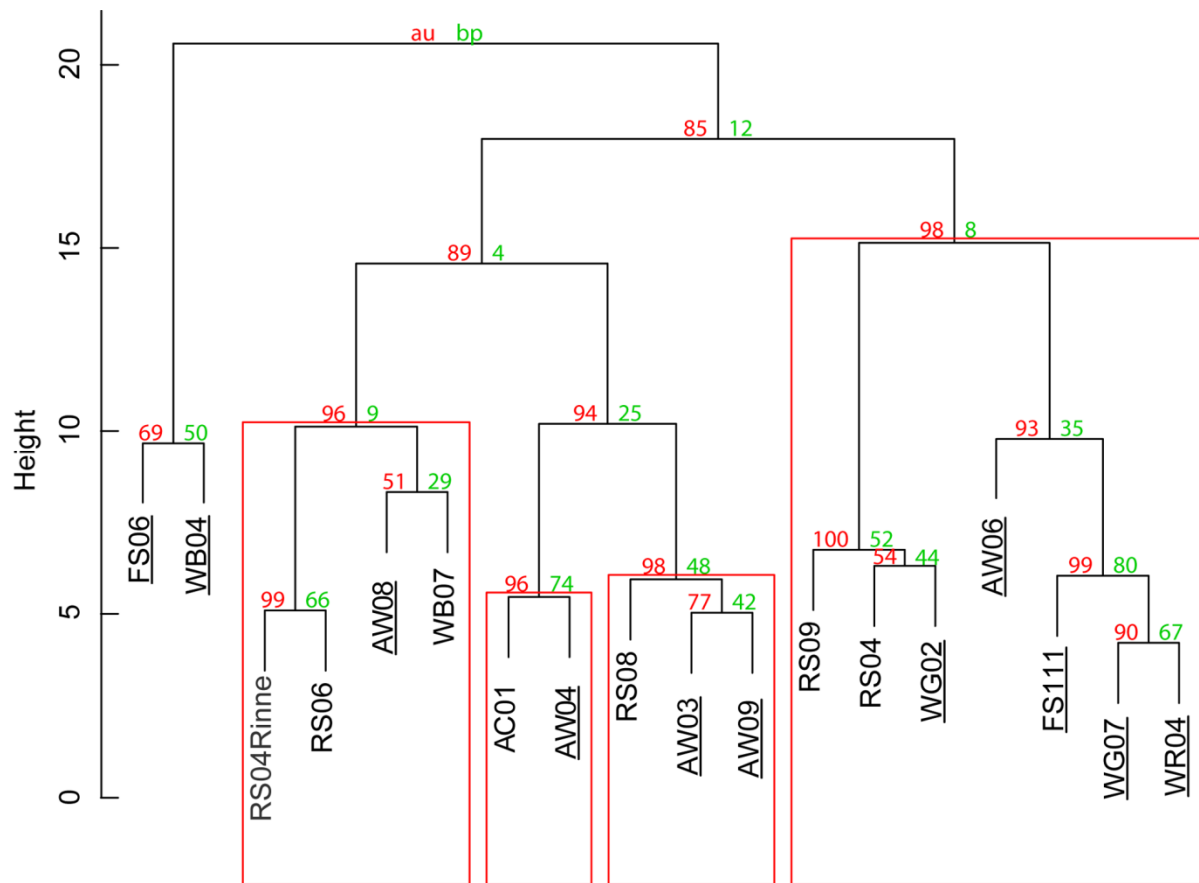

**Figure S1.** Study ponds grouped by scaled abiotic habitat parameters based on Ward's clustering of Euclidean dissimilarity matrix and multiscale bootstrap resampling ( $n = 1000$ ). Given are au (approximately unbiased, Shimodaira 2002) and bp (bootstrap probability) p-values for the respective clusters. Clusters which are strongly supported by the data ( $au > 0.95$ ) are highlighted by rectangles. Emigration ponds are underlined. There is no pattern in environmental characteristics explaining failure of emigration of *Rana temporaria* in some ponds.

Shimodaira H (2002) An approximately unbiased test of phylogenetic tree selection. *Systematic Biology* 51: 492–508.
